# Supplementary material for: Tackling Complex Analytical Tasks: An ISO/TS-Based Validation Approach for Hydrodynamic Chromatography Single Particle Inductively Coupled Plasma Mass Spectrometry
Source: MDPI journal article supplement (doi:10.3390/ma13061447), 2020-03-22

# Tackling Complex Analytical Tasks: An ISO/TS-Based Validation Approach for Hydrodynamic Chromatography Single Particle Inductively Coupled Plasma Mass Spectrometry

Yves U. Hachenberger <sup>1,†</sup> and Daniel Rosenkranz <sup>1,\*</sup>, Fabian L. Kriegel <sup>1</sup>, Benjamin Krause <sup>1</sup>, René Matschaß <sup>1,2</sup>, Philipp Reichardt <sup>1</sup>, Jutta Tentschert <sup>1</sup>, Peter Laux <sup>1</sup>, Norbert Jakubowski <sup>3</sup>, Ulrich Panne <sup>2</sup> and Andreas Luch <sup>1</sup>

<sup>1</sup> Department of Chemical & Product Safety, German Federal Institute for Risk Assessment (BfR), Max-Dohrn-Strasse 8-10, 10589 Berlin, Germany

<sup>2</sup> Federal Institute for Materials Research and Testing (BAM), Richard-Willstätter-Strasse 11, 12489 Berlin, Germany

<sup>3</sup> SPETEC GmbH, Berghamer Str. 2, 85435 Erding, Germany

\* Correspondence: Daniel.Rosenkranz@bfr.bund.de

† These authors contributed equally.

## 1. Calculation of the Instrumental Transport Efficiency

Our study employed two approaches for determination of the instrumental transport efficiency.

### 1.1. The Counting Method

The transport efficiency  $\eta_{\text{counting}}$  (%) is calculated as:

$$\eta_{\text{counting}} = (60 \times q_p) / (c_p \times \dot{v}) \times 100\%, \quad (\text{S1})$$

with  $q_p$ —particle stream into the plasma ( $\text{particle} \times \text{s}^{-1}$ ),  $c_p$ —particle number concentration ( $\text{particle} \times \text{mL}^{-1}$ ) and  $\dot{v}$ —as the sample uptake rate ( $\text{mL} \times \text{min}^{-1}$ ).

### 1.2. The Size Method

The transport efficiency of the size method  $\eta_{\text{size}}$  (%) is calculated as:

$$\eta_{\text{size}} = (R_{\text{ionic}}/R_P) \times 100\%, \quad (\text{S2})$$

$R_{\text{ionic}}$  is defined as:

$$R_{\text{ionic}} = (R_{\text{Fion}} \times 6 \times 10^4) / (\dot{v} \times t_d), \quad (\text{S3})$$

$R_{\text{Fion}}$ —analyte sensitivity ( $\text{cps}(\text{ng mL}^{-1})^{-1}$ )  $t_d$ —dwell time (ms) and

$$R_P = (\bar{I}_P/m_P), \quad (\text{S4})$$

with  $\bar{I}_P$ —background corrected average particle intensity (cps) and  $m_P$ —mass of particle ( $\mu\text{g}$ ).

## 2. Estimation of the Particle Size

The particle size  $d_p$  (nm) is defined as:

$$d_p = [(6 \times m_P) / \pi \times p_p]^{-(1/3)} \times 10^4, \quad (\text{S5})$$

$p_p$  corresponds to the bulk material density ( $\text{g mL}^{-1}$ ). The transport efficiency ( $\eta$ ), which was derived from either the counting method (see Equation (S1)) or the size method (see Equations (S2)–(S4)) is now used to calculate  $m_P$ :

$$m_P = [(I_P \times t_d) / (R_{\text{Fion}})] \times [(\dot{v} \times \eta) / 60] \times (M_P/M_A), \quad (\text{S6})$$

$I_p$ —background corrected particle intensity (cps),  $M_p$ —molar mass of the particles and  $M_a$ —the molar mass of the analyte.

### 3. Estimation of the Particle Number Concentration

The particle number concentration  $c_p$  (particles  $\times L^{-1}$ ) is considered as:

$$c_p = (d_p/\eta) \times (1000/\dot{v}). \quad (S7)$$

#### 3.1. Limits of Detection for the Particle Number Concentration

The limit of detection for the number based concentration  $LOD_{NP}$  (particle  $\times L^{-1}$ ) is calculated as:

$$LOD_{NP} = (\bar{n}_p + 3 \times SD_p) / (\eta \times \dot{v} \times t_a). \quad (S8)$$

$\bar{n}_p$ —average number of particles in blank samples (particles),  $SD_p$ —standard deviation of the average number of particles and  $t_a$ —total measurement time of each experiment (min). The limit of detection for the mass based concentration  $LOD_{MP}$  (ng  $\times L^{-1}$ ) is defined as:

$$LOD_{MP} = LOD_{NP} \times \bar{m}_p, \quad (S9)$$

$\bar{m}_p$ —average particle mass (ng).

### 4. Estimation of the Background

Determination of the ionic background intensity ( $I_{BG}$ ) was in accordance to the  $3\sigma$ -approach with:

$$I_{BG} = \bar{I}_{BG} + 3 \times I_{SD}, \quad (S10)$$

$\bar{I}_{BG}$ —average intensity of the original background,  $I_{SD}$ —standard deviation of the average background intensity.

### 5. Additional Tables

**Table S1.** Comparison of spICP-MS and HDC-spICP-MS measurements of blank solutions and 60 nm Au-NPs (Au NIST 8013, 50 ppt) over 1 month ( $n = 5$ , at 5 days).

| Parameters                                                     | spICP-MS   | HDC-spICP-MS |
|----------------------------------------------------------------|------------|--------------|
| Number of particulate events (blanks)                          | 6 (3)      | 6 (3)        |
| Number of particulate events (samples)                         | 99 (8)     | 183 (15)     |
| Transport efficiency (%)                                       | 2.94       | 8.74         |
| Number of particles per run ( $\times 10^3 \text{ mL}^{-1}$ )  | 26.7 (2.1) | 26.7 (3.9)   |
| Expected number of particles ( $\times 10^3 \text{ mL}^{-1}$ ) | 26.7       | 26.7         |

**Table S2.** DLS measurements of the hydrodynamic diameter ( $d_H$ ) and zeta potential for the used 30 nm Au-NP, lipids only and the lipids loaded with 30 nm Au-NP ( $n = 3$ ).

| -           | $d_H$ (nm)  |             | zeta potential (mV) |             |
|-------------|-------------|-------------|---------------------|-------------|
| 30 nm Au-NP | 43.05 (0.5) |             | -21.7 (1.2)         |             |
| -           | empty       | loaded      | empty               | loaded      |
| El-01-C     | 204.4 (1.4) | 231.1 (4.7) | 75.4 (0.7)          | 37.5 (2.8)  |
| El-11-C     | 163.9 (1)   | 149 (1.6)   | 27.1 (2.1)          | -30.3 (0.3) |
| El-01-PN    | 175.7 (1.1) | 177.1 (0.7) | -76 (1.9)           | -87.9 (1.5) |

### 6. Additional Figures

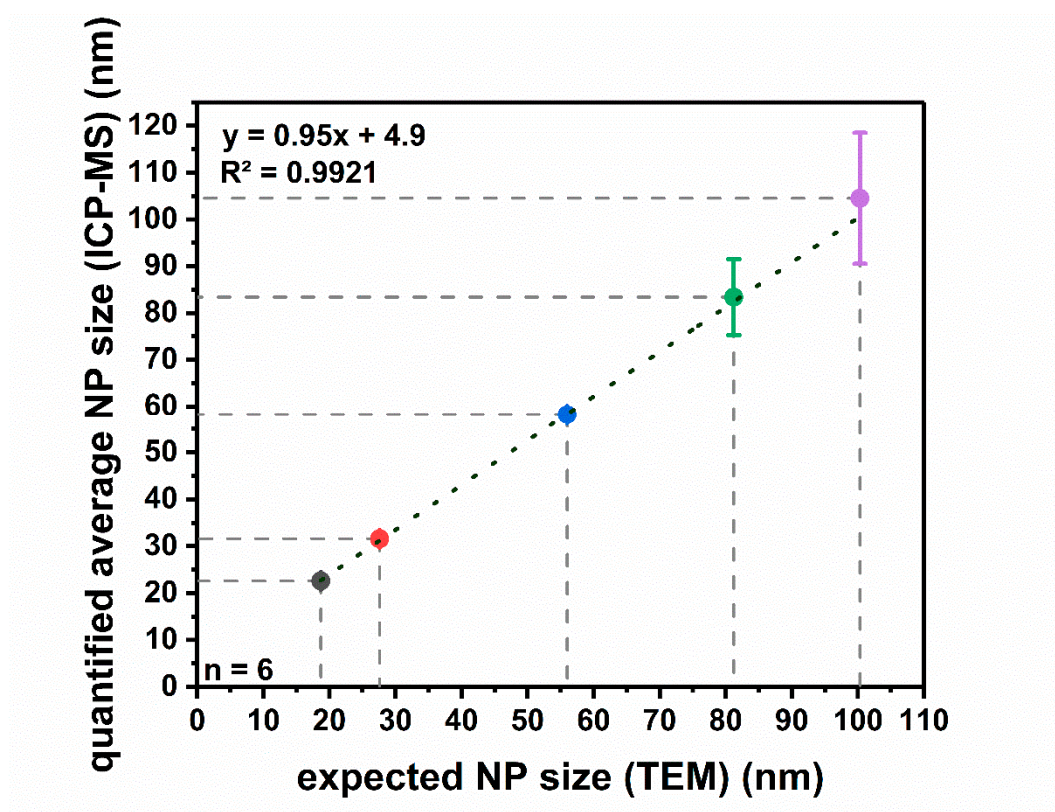

Figure S1. Expected (TEM) versus quantified average NP size measured with ICP-MS.

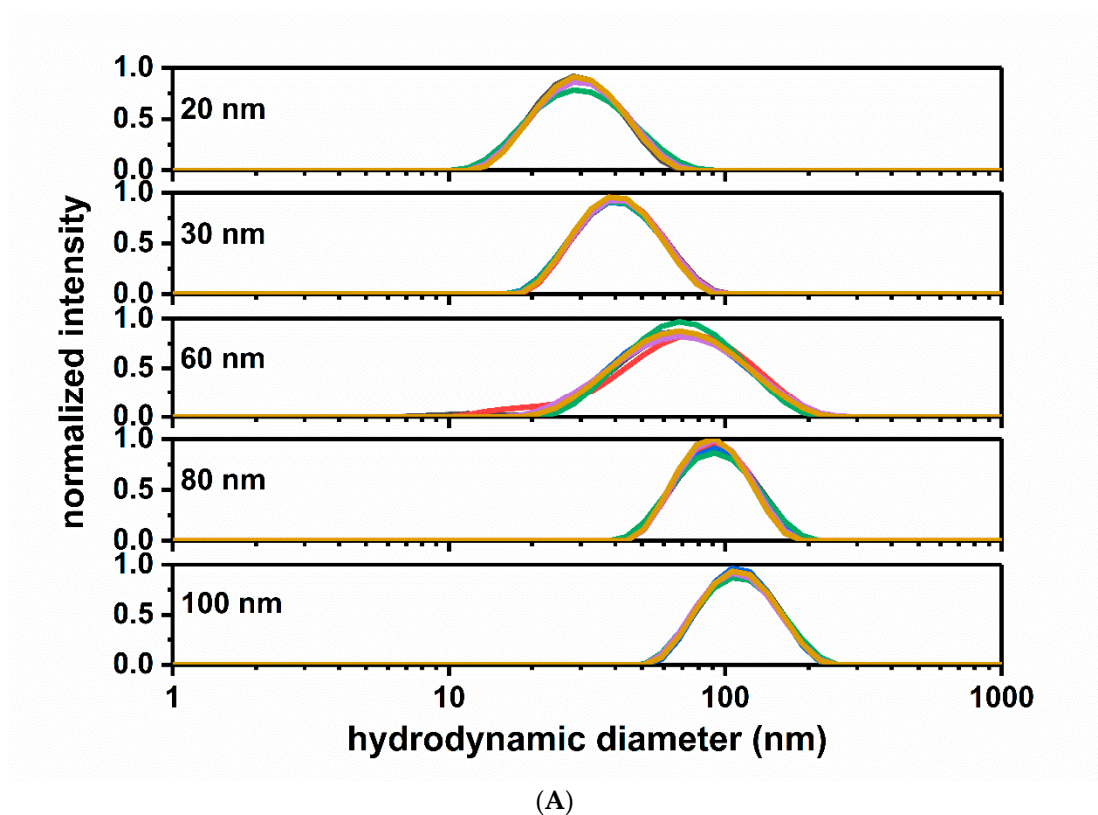

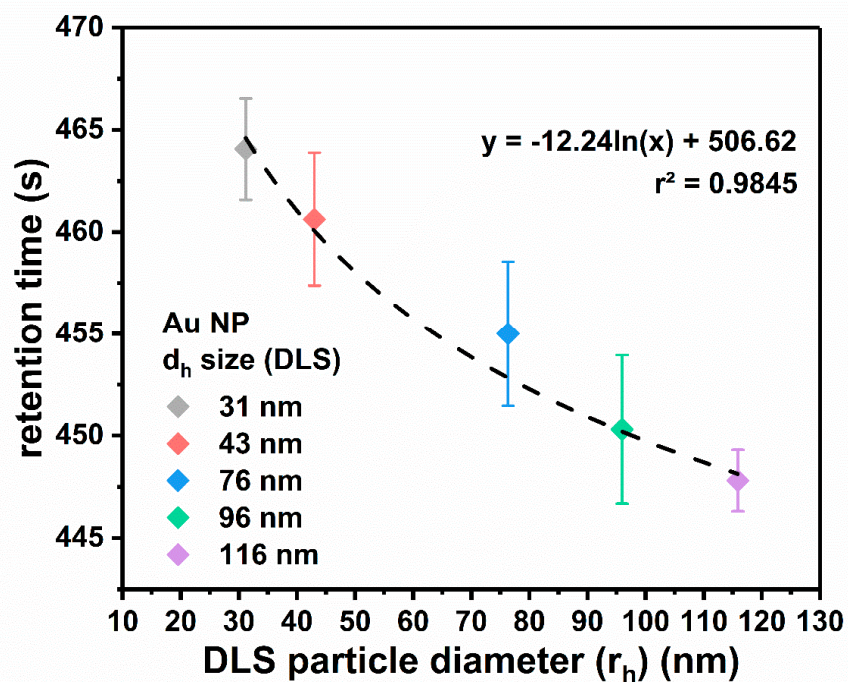

(B)

**Figure S2.** (A) DLS-derived hydrodynamic size of different Au-NPs (20–100 nm) in the eluent of the HDC ( $n = 6$ ). (B) Calibration curve for HDC retention time with DLS measured hydrodynamic diameters.

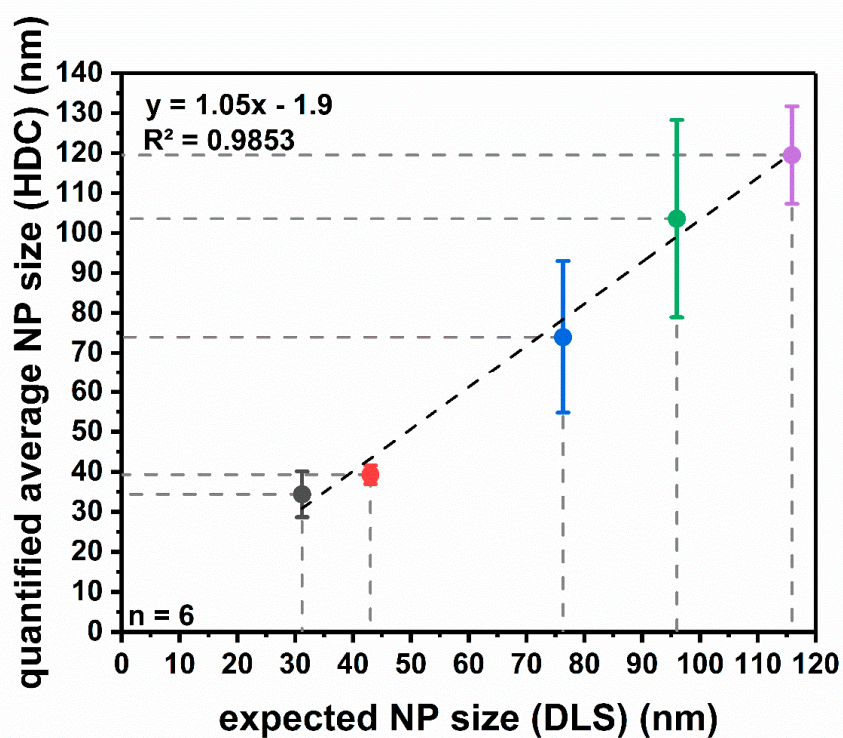

**Figure S3.** Expected (DLS) versus quantified average NP size calculated by using the HDC retention time. For both techniques the particles are measured in the eluent used for the HDC-spICP-MS.



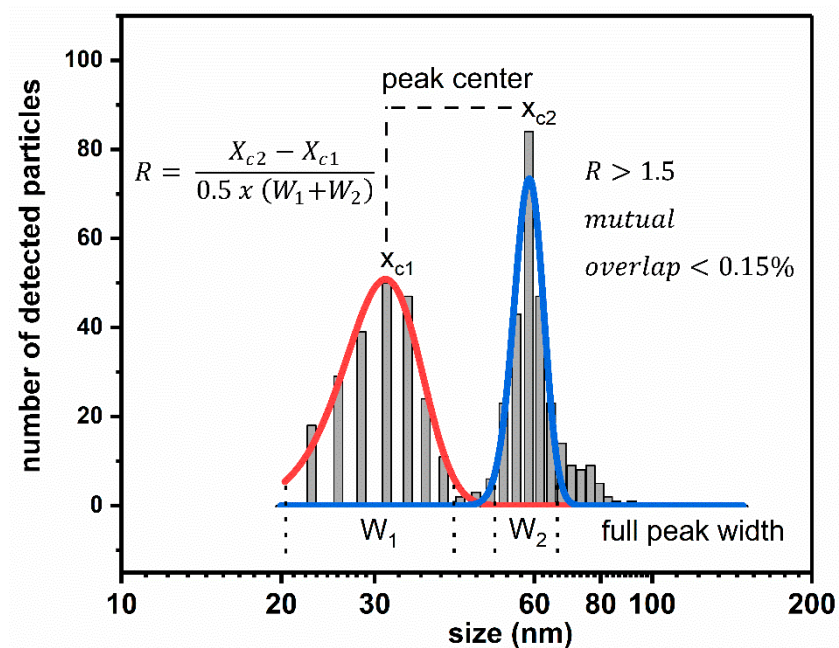

**Figure S4.** Schematically description for the estimation of resolution ( $R$ ) between 2 different size populations (30 and 60 nm Au-NP) in accordance to LC-MS techniques.

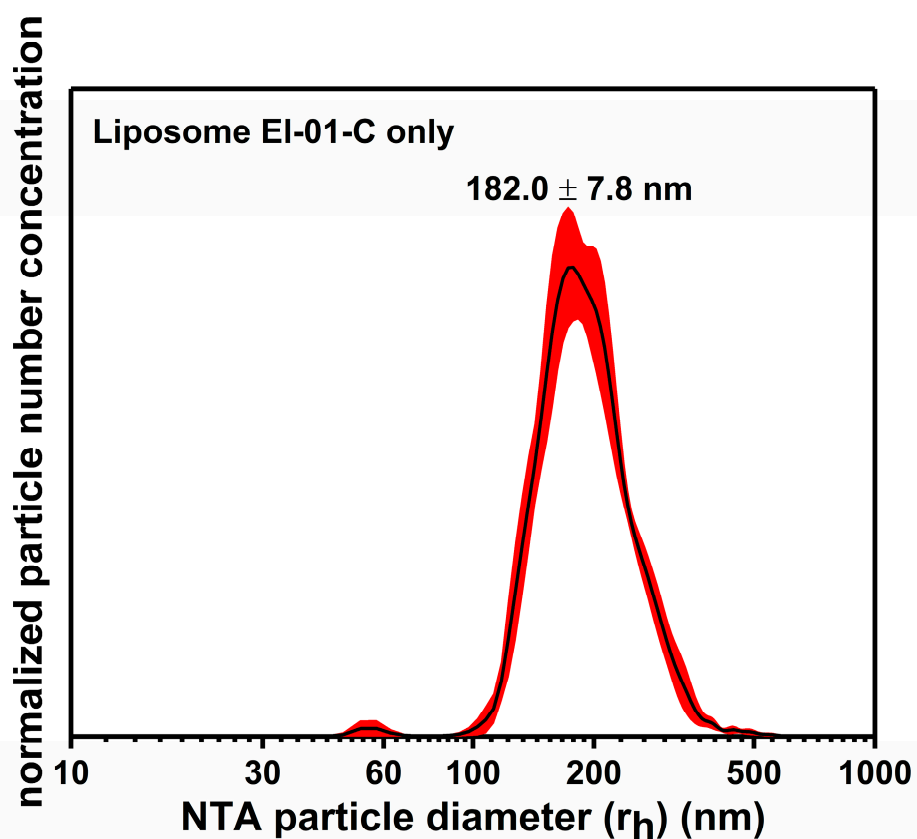

**Figure S5.** NTA derived particle number distribution for unloaded liposome EL-01-C.

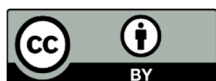

Supplement: s1 [file s1]
